# Supplementary material for: Identification of Candidate Genes for Calcium and Magnesium Accumulation in Brassica napus L. by Association Genetics
Source: Front Plant Sci. 2017 Nov 15;8:1968. doi: 10.3389/fpls.2017.01968 (PMC5694822; doi:10.3389/fpls.2017.01968)
Supplement: Supplementary file 1 [file Data_Sheet_1.XLSX]

## Sheet: Sheet1
Supplementary table 1: Block design of preliminary Arabidopsis thaliana phenotyping experiment
Rep	Well	Line
1	1	At5g07320.2		Plan:
1	2	At2g13610.2
1	3	At5g03960.1		Rep 1, well 1	Rep 1, well 2	Rep 1, well 3	Rep 1, well 4	Rep 2, well 1	Rep 2, well 2	Rep 2, well 3	Rep 2, well 4	Rep 3, well 1	Rep 3, well 2	Rep 3, well 3	Rep 3, well 4
1	4	At5g14040.1		Rep 1, well 5	Rep 1, well 6	Rep 1, well 7	Rep 1, well 8	Rep 2, well 5	Rep 2, well 6	Rep 2, well 7	Rep 2, well 8	Rep 3, well 5	Rep 3, well 6	Rep 3, well 7	Rep 3, well 8
1	5	At5g07320.1		Rep 1, well 9	Rep 1, well 10	Rep 1, well 11	Rep 1, well 12	Rep 2, well 9	Rep 2, well 10	Rep 2, well 11	Rep 2, well 12	Rep 3, well 9	Rep 3, well 10	Rep 3, well 11	Rep 3, well 12
1	6	At5g06530.1		Rep 1, well 13	Rep 1, well 14	Rep 1, well 15	Rep 1, well 16	Rep 2, well 13	Rep 2, well 14	Rep 2, well 15	Rep 2, well 16	Rep 3, well 13	Rep 3, well 14	Rep 3, well 15	Rep 3, well 16
1	7	At2g45660.1		Rep 4, well 1	Rep 4, well 2	Rep 4, well 3	Rep 4, well 4	Rep 5, well 1	Rep 5, well 2	Rep 5, well 3	Rep 5, well 4	Rep 6, well 1	Rep 6, well 2	Rep 6, well 3	Rep 6, well 4
1	8	At5g06530.2		Rep 4, well 5	Rep 4, well 6	Rep 4, well 7	Rep 4, well 8	Rep 5, well 5	Rep 5, well 6	Rep 5, well 7	Rep 5, well 8	Rep 6, well 5	Rep 6, well 6	Rep 6, well 7	Rep 6, well 8
1	9	At5g48650.1		Rep 4, well 9	Rep 4, well 10	Rep 4, well 11	Rep 4, well 12	Rep 5, well 9	Rep 5, well 10	Rep 5, well 11	Rep 5, well 12	Rep 6, well 9	Rep 6, well 10	Rep 6, well 11	Rep 6, well 12
1	10	At5g08670.1		Rep 4, well 13	Rep 4, well 14	Rep 4, well 15	Rep 4, well 16	Rep 5, well 13	Rep 5, well 14	Rep 5, well 15	Rep 5, well 16	Rep 6, well 13	Rep 6, well 14	Rep 6, well 15	Rep 6, well 16
1	11	At2g05120.1
1	12	At5g48650.2
1	13	At5g10520.2
1	14	At2g13610.1
1	15	At5g10520.1
1	16	Col-0
2	1	At5g07320.1
2	2	At5g06530.1
2	3	At5g03960.1
2	4	At2g45660.1
2	5	At5g07320.2
2	6	At2g13610.1
2	7	At5g06530.2
2	8	At5g14040.1
2	9	Col-0
2	10	At2g05120.1
2	11	At5g48650.1
2	12	At2g13610.2
2	13	At5g08670.1
2	14	At5g10520.2
2	15	At5g10520.1
2	16	At5g48650.2
3	1	At5g10520.1
3	2	At2g05120.1
3	3	At5g06530.2
3	4	At5g06530.1
3	5	At5g48650.2
3	6	At2g13610.2
3	7	At5g10520.2
3	8	At5g08670.1
3	9	At5g03960.1
3	10	At2g13610.1
3	11	At5g14040.1
3	12	At5g07320.2
3	13	At5g48650.1
3	14	At2g45660.1
3	15	At5g07320.1
3	16	Col-0
4	1	At5g07320.1
4	2	At2g45660.1
4	3	At5g10520.1
4	4	At5g08670.1
4	5	At5g10520.2
4	6	At5g06530.2
4	7	Col-0
4	8	At5g03960.1
4	9	At5g14040.1
4	10	At2g05120.1
4	11	At5g07320.2
4	12	At5g48650.1
4	13	At5g48650.2
4	14	At2g13610.2
4	15	At2g13610.1
4	16	At5g06530.1
5	1	At5g48650.2
5	2	At2g45660.1
5	3	At5g06530.1
5	4	At2g13610.1
5	5	At2g13610.2
5	6	At5g10520.1
5	7	At5g07320.2
5	8	Col-0
5	9	At5g10520.2
5	10	At5g48650.1
5	11	At5g07320.1
5	12	At2g05120.1
5	13	At5g06530.2
5	14	At5g08670.1
5	15	At5g03960.1
5	16	At5g14040.1
6	1	Col-0
6	2	At2g05120.1
6	3	At5g03960.1
6	4	At5g10520.2
6	5	At5g07320.1
6	6	At5g06530.2
6	7	At5g48650.1
6	8	At2g45660.1
6	9	At5g14040.1
6	10	At5g07320.2
6	11	At5g48650.2
6	12	At5g10520.1
6	13	At2g13610.2
6	14	At5g08670.1
6	15	At2g13610.1
6	16	At5g06530.1
