# Supplementary material for: Identification of Candidate Genes for Calcium and Magnesium Accumulation in Brassica napus L. by Association Genetics
Source: Front Plant Sci. 2017 Nov 15;8:1968. doi: 10.3389/fpls.2017.01968 (PMC5694822; doi:10.3389/fpls.2017.01968)
Supplement: Supplementary file 2 [file Data_Sheet_2.XLSX]

## Sheet: Sheet1
Supplementary table 2: Block design of Arabidopsis thaliana tissue partitioning phenotyping experiment
	Block 1		Block 2		Block 3		Block 4
	Block 5		Block 6		Block 7		Block 8
	Block 9		Block 10		Block 11		Block 12
	At5g07320.2	Col-0	At2g13610.2	Col-0	At5g48650.2	Col-0	At5g48650.2	Col-0
	At5g48650.2	At2g13610.2	At5g07320.2	At5g48650.2	At2g13610.2	At5g07320.2	At2g13610.2	At5g07320.2
	At5g07320.2	Col-0	Col-0	At5g48650.2	At2g13610.2	At5g48650.2	At2g13610.2	At5g48650.2
	At2g13610.2	At5g48650.2	At2g13610.2	At5g07320.2	Col-0	At5g07320.2	At5g07320.2	Col-0
	At2g13610.2	At5g07320.2	At2g13610.2	At5g07320.2	At5g07320.2	Col-0	At5g07320.2	At2g13610.2
	Col-0	At5g48650.2	At5g48650.2	Col-0	At5g48650.2	At2g13610.2	Col-0	At5g48650.2
