# Supplementary material for: Identification of Candidate Genes for Calcium and Magnesium Accumulation in Brassica napus L. by Association Genetics
Source: Front Plant Sci. 2017 Nov 15;8:1968. doi: 10.3389/fpls.2017.01968 (PMC5694822; doi:10.3389/fpls.2017.01968)
Supplement: Supplementary file 3 [file Data_Sheet_3.XLSX]

## Sheet: Sheet1
Supplementary table 3: Shoot Ca and Mg concentration data from preliminary Arabidopsis thaliana phenotyping experiment
Line name	Rep	Ca (mg/kg)	Mg (mg/kg)
AT2G05120.1	1	16947.7	16186.9
AT2G05120.1	2	26386.7	15001.8
AT2G05120.1	3	21624.6	11556.6
AT2G05120.1	4	19350	11792.3
AT2G05120.1	5	16356.3	10225.9
AT2G05120.1	6	11558.3	12362.7
AT2G13610.1	1	18167.1	10775.4
AT2G13610.1	2	14282.6	8188.89
AT2G13610.2	1	12777.3	9727.78
AT2G13610.2	2	13131.3	10986.5
AT2G13610.2	3	14870.4	13382.4
AT2G13610.2	4	16934.4	11225.9
AT2G13610.2	5	21545.8	13752.6
AT2G13610.2	6	9196.68	8413.82
AT2G45660.1	1	19997.9	12726.2
AT2G45660.1	2	20463.3	11207.9
AT2G45660.1	4	15506.9	10256.3
AT2G45660.1	3	22032.6	12593.1
AT5G03960.1	1	20969.9	13267.9
AT5G03960.1	2	22256.9	14074.6
AT5G03960.1	3	24548.3	14159
AT5G03960.1	4	17162.2	15211
AT5G06530.1	2	19109.9	11550
AT5G06530.1	3	20673.9	12942.5
AT5G06530.1	4	19032.2	11655.8
AT5G06530.1	1	16897.9	10463.9
AT5G06530.2	1	17514	11198.7
AT5G06530.2	2	18137.8	10387
AT5G07320.1	1	14684.1	10932.6
AT5G07320.1	2	24153.8	12599.3
AT5G07320.1	5	19076.1	11984.3
AT5G07320.1	6	8684.11	9012.42
AT5G07320.1	3	21937.3	13264.9
AT5G07320.1	4	19366.1	12528.9
AT5G07320.2	2	17200.7	10475.6
AT5G07320.2	5	18746.6	11585.3
AT5G07320.2	4	17853.5	10496.3
AT5G07320.2	1	13491.5	11193
AT5G08670.1	3	23719.4	13308.1
AT5G08670.1	4	9070.62	8868
AT5G08670.1	5	23555.7	12455.9
AT5G08670.1	6	16097.8	10144.9
AT5G08670.1	1	14087.9	8215.35
AT5G10520.1	1	20066.4	11167.4
AT5G10520.1	2	20900.2	13107
AT5G10520.1	3	22589	12669
AT5G10520.1	4	14823.8	10342.4
AT5G10520.1	5	16149.5	10259.3
AT5G10520.1	6	17591.9	10540.1
AT5G10520.2	1	20815.3	12220.3
AT5G10520.2	2	20754.4	12658.4
AT5G10520.2	3	18885.5	11928.8
AT5G10520.2	4	16658.8	10738.1
AT5G10520.2	5	22559.5	13643.8
AT5G10520.2	6	19118.5	12422.3
AT5G14040.1	1	11829.4	9274.79
AT5G14040.1	2	21874.7	13430.4
AT5G14040.1	3	18501.1	12371.3
AT5G14040.1	6	20114.5	12054.9
AT5G14040.1	5	20344.4	12074.6
AT5G48650.1	1	15774.8	11925.4
AT5G48650.1	3	20019	12125.2
AT5G48650.1	2	19649.9	11441.9
AT5G48650.1	4	24650.5	15021.2
AT5G48650.1	5	20420.9	11931.1
AT5G48650.1	6	18839.8	12731
AT5G48650.2	1	16885.2	11210.7
AT5G48650.2	2	15952.5	10853.2
AT5G48650.2	3	16231.7	9960.27
AT5G48650.2	4	16013.1	9999.04
AT5G48650.2	5	20553.1	12461.4
AT5G48650.2	6	9068.89	8707.39
Col-0	1	24398	14174.2
Col-0	2	21805.4	11737.8
Col-0	5	19448.9	11929.9
Col-0	4	18639.6	11092
Col-0	6	24115.6	13231.1
