# Supplementary material for: Identification of Candidate Genes for Calcium and Magnesium Accumulation in Brassica napus L. by Association Genetics
Source: Front Plant Sci. 2017 Nov 15;8:1968. doi: 10.3389/fpls.2017.01968 (PMC5694822; doi:10.3389/fpls.2017.01968)
Supplement: Supplementary file 4 [file Data_Sheet_4.XLSX]

## Sheet: Sheet1
Supplementary table 4: Shoot Ca and Mg concentration data from Arabidopsis thaliana tissue partitioning phenotyping experiment
Line	Row (rep)	Rosette Ca (mg/kg)	Rosette Mg (mg/kg)	Silique Ca (mg/kg)	Silique Mg (mg/kg)	Stem Ca (mg/kg)	Stem Mg (mg/kg)	Stem leaf Ca (mg/kg)	Stem leaf Mg (mg/kg)
AT2G13610.2	1	32966	22095.5	9162.02	6083.36	6458.54	3560.9	38283.2	21045.7
AT2G13610.2	2	35874.5	19587.8	8452.48	5973.77	5879.5	3224.91	37549.5	19471.1
AT2G13610.2	3	34830.9	19240.8	8391.42	5739.48	5991.9	2941.48	38975	18027
AT5G07320.2	1	33705.5	21003.4	8230.09	5784.36	5360.09	3196.47	39970.4	20683.4
AT5G07320.2	2			9043.49	6287.51	5345.39	2966.28	37546.2	19343.8
AT5G07320.2	3	35559.9	22475.5	8666.35	6221.71	5203.76	2914.9	38453.4	19973.5
AT5G48650.2	1	35272.6	20026.4	8536.04	5877.95	5283.23	2759.81	37192.7	19728.2
AT5G48650.2	2	36421.6	20679.5	8919.94	6390.13	6014.86	3219.85	37850.5	18303.8
AT5G48650.2	3	37220.8	20330.9	8055.34	5893.04	4996.74	2608.26	37551.1	18893.5
Col-0	1	34329.5	21438.7	10348.5	6355.49	7303.53	3894.61	40536.1	21328.6
Col-0	2	39882.1	23999.5	9925.59	6559.97	5987.95	3226.18
Col-0	3	36473.2	22211.7	9614.25	6416.36	5848.62	3425.09	39148.8	20564.9
